# Supplementary material
Source: publisher site journal article supplement (https://www.dovepress.com/article/239044)

**Supplementary Table 1** Univariable linear regression analyses examining the association of various factors of interest with the change in the total CAT score from enrollment to the 12-week follow-up visit

|  | | | | | **95% Wald CI** | |  |
| --- | --- | --- | --- | --- | --- | --- | --- |
|  | | **OLS mean changea** | **OLS estimateb** | **Standard error** | **Lower limit** | **Upper limit** | **p-value** |
| **Sex (N = 279)** | Males vs. Females | -3.418 vs. -4.500 | 1.082 | 0.474 | 0.148 | 2.016 | **0.023** |
| **Age group (N = 285)** | ≥65 vs. <65 years | -4.229 vs. -3.364 | -0.866 | 0.410 | -1.673 | -0.058 | **0.036** |
| **BMI (kg/m2) (N = 285)** | <25 vs. ≥25 kg/m2 | -3.126 vs. -3.944 | 0.818 | 0.433 | -0.035 | 1.671 | 0.060 |
| **Obesity (BMI ≥30 kg/m2) (N = 285)** | Yes vs. No | -3.901 vs. -3.613 | -0.288 | 0.445 | -1.164 | 0.587 | 0.517 |
| **Smoking (N = 285)** | Smokers vs. Other | -4.072 vs. -3.454 | -0.618 | 0.410 | -1.426 | 0.190 | 0.133 |
| **Newly-diagnosed COPD (N = 285)** | Yes vs. No | -4.378 vs. -3.455 | -0.923 | 0.455 | -1.819 | -0.028 | **0.043** |
| **Cardiac/vascular disorders (N = 285)** | Yes vs. No | -3.497 vs. -3.959 | 0.462 | 0.405 | -0.335 | 1.259 | 0.255 |
| **Metabolism/nutrition disorders (N = 285)** | Yes vs. No | -3.318 vs. -3.863 | 0.545 | 0.434 | -0.309 | 1.398 | 0.210 |
| **Comorbidity count (N = 285)** | ≥2 vs. <2 | -3.448 vs. -3.944 | 0.496 | 0.401 | -0.293 | 1.285 | 0.217 |
| **No prior treatment with LAMA (N = 284)** | Yes vs. No | -3.978 vs. -3.133 | -0.846 | 0.421 | -1.674 | -0.018 | **0.045** |
| **Previous ICS, LABA, and/or LAMA (N = 284)** | Yes vs. No | -3.583 vs. -3.950 | 0.367 | 0.447 | -0.514 | 1.247 | 0.413 |
| **Aclidinium bromide initiated as add-on with other inhaled maintenance treatment (N = 250)** | Yes vs. No | -3.885 vs. -2.588 | -1.296 | 0.439 | -2.162 | -0.431 | **0.003** |
| **No prior LAMA & aclidinium bromide initiated without other inhaled maintenance treatment (N = 249)** | Yes vs. No | -2.333 vs. -3.598 | 1.265 | 0.834 | -0.378 | 2.908 | 0.131 |
| **Presence of night-time symptoms (N = 279)** | Yes vs. No | -4.431 vs. -2.362 | -2.069 | 0.399 | -2.855 | -1.284 | **<0.001** |
| **Severity of night-time symptoms (N = 279)** | At least moderate symptoms vs. No/Mild symptoms | -4.949 vs. -3.140 | -1.809 | 0.436 | -2.668 | -0.951 | **<0.001** |
| **Severity of early-morning symptoms  (N = 277)** | At least moderate symptoms vs. No/Mild symptoms | -4.610 vs. -2.257 | -2.353 | 0.396 | -3.134 | -1.573 | **<0.001** |
| **At least moderate early-morning and/or night-time symptoms (N = 276)** | Yes vs. No | -4.570 vs. -2.021 | -2.549 | 0.395 | -3.327 | -1.772 | **<0.001** |

a ‘OLS mean change’ refers to the model-estimated change in the total CAT score in the subgroup of interest, with negative values indicating a decrease from enrollment to the follow-up visit.

b ‘OLS estimate’ refers to the difference in the OLS mean change between the two examined subgroups.

**Note:** Values in bold indicate statistically significant associations

**Abbreviations:** BMI, body-mass index; CAT, COPD assessment test; CI, confidence interval; COPD, chronic obstructive pulmonary disease; ICS, inhaled corticosteroids; LABA, long-acting β agonists; LAMA, long-acting muscarinic antagonists; OLS, ordinary least squares


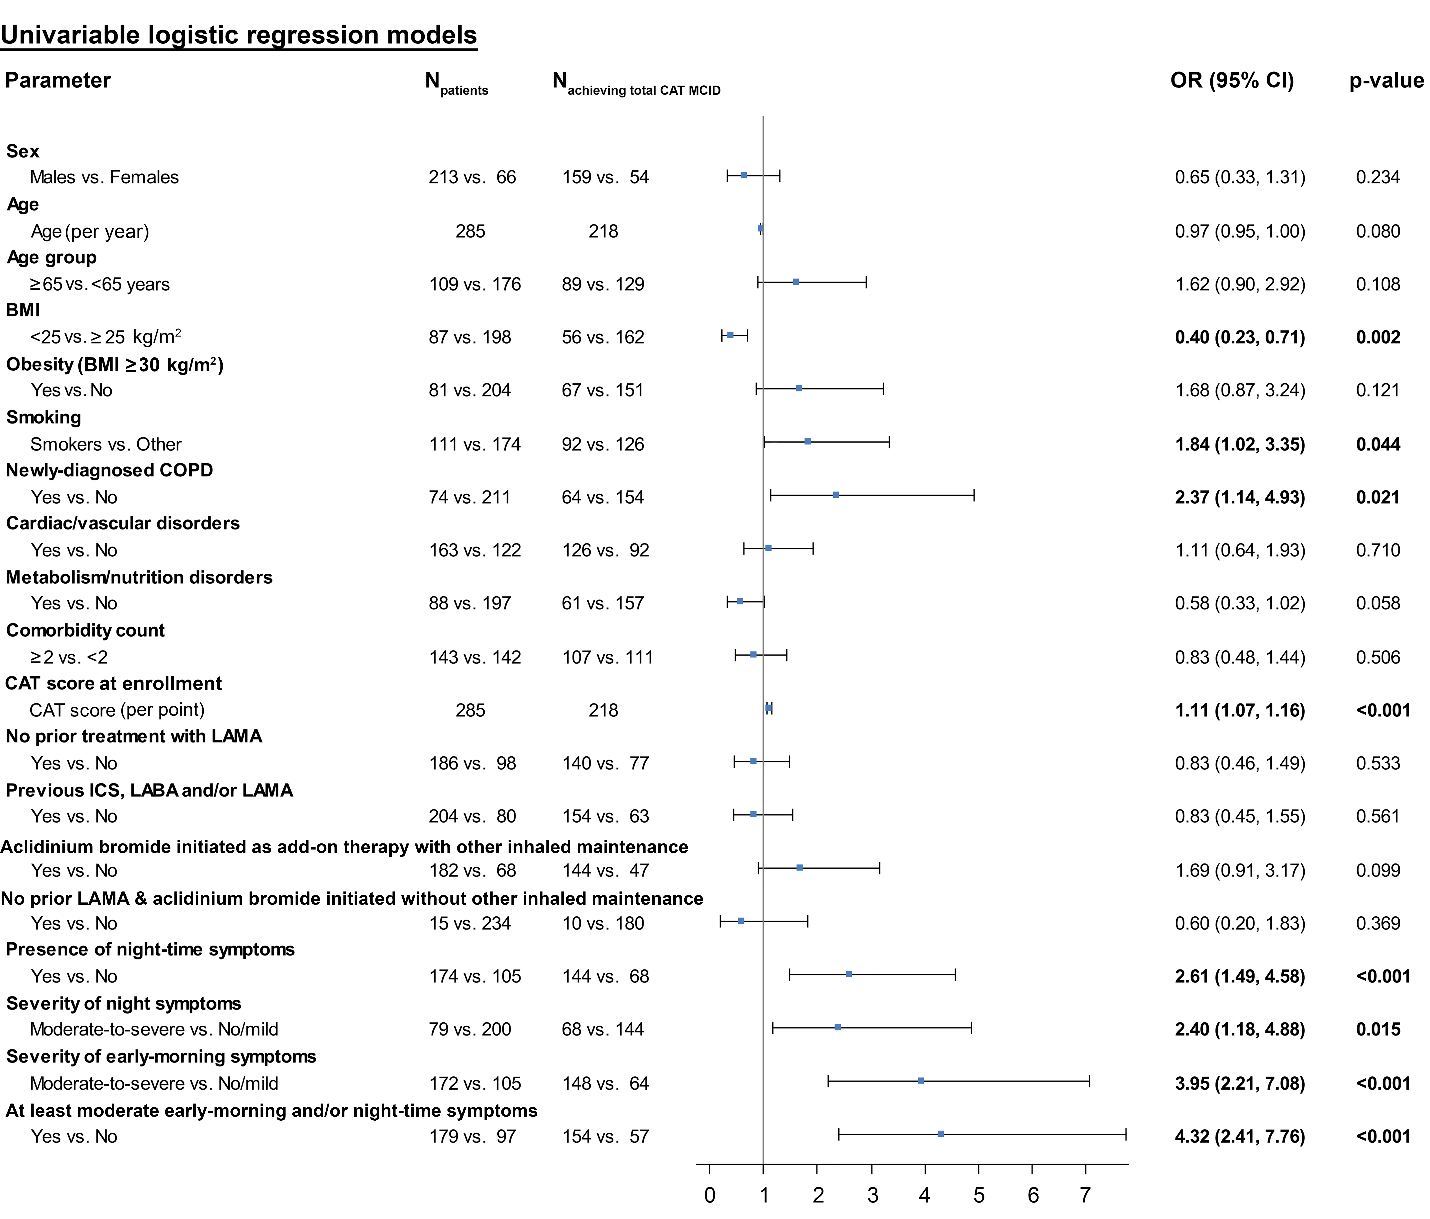

Supplement: Supplementary file 1 [file get_supplementary_file.php]
